# Supplementary material for: Oxadiazole containing poly(p-phenylenevinylene)s: synthesis and characterization
Source: Royal Society of Chemistry journal article supplement (doi:10.1039/c2nj40194k), 2012-01-01
Supplement: c2nj40194k.pdf [file c2nj40194k.pdf]

Electronic Supplementary Information

## **Oxadiazole Containing Poly(p-phenylenevinylene)s: Synthesis and Characterization**

Pengfei Li<sup>§</sup>, Shanpeng Wen<sup>§</sup>, Weidong Cheng, Jibo Zhang, Shiyu Yao, Bin Xu,  
Wenjing Tian\*

State key laboratory of supramolecular structure and materials, Jilin University,

Changchun 130012, P. R. China

\*Corresponding author : E-mail address: [wjtian@jlu.edu.cn](mailto:wjtian@jlu.edu.cn) (Wenjing Tian\*)

Tel.: +86431 85166368

Fax: +86431 85193421

- |                                                                           |    |
|---------------------------------------------------------------------------|----|
| 1. <sup>1</sup> H NMR spectrum and chemical structure of monomer <b>7</b> | S2 |
| 2. J-V curve in the dark of an ITO/Polymer <b>8a</b> /LiF/Al device       | S3 |
| 3. J-V curve in the dark of an ITO/PEDOT:PSS/Polymer <b>8a</b> /Au device | S3 |

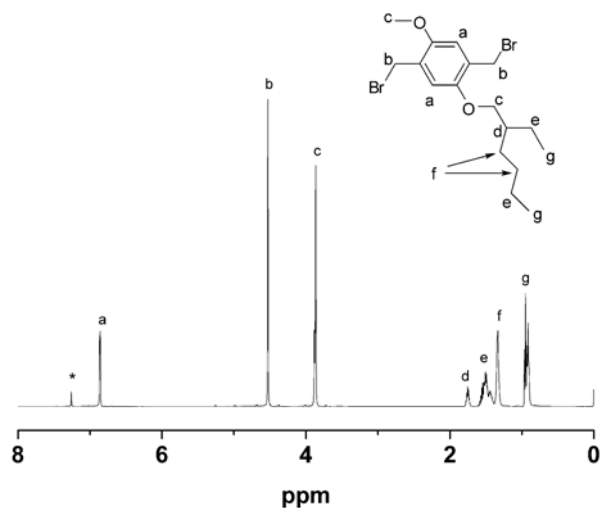

Figure 1. <sup>1</sup>H NMR spectrum and chemical structure of monomer **7** in CDCl<sub>3</sub> solution.

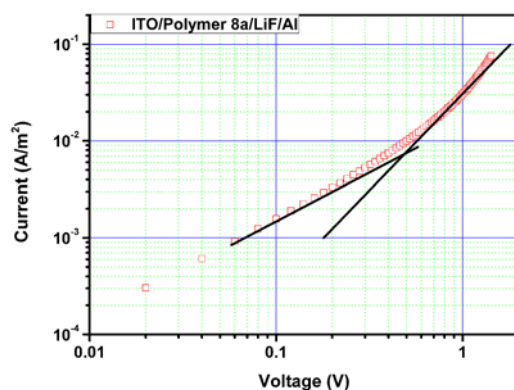

Figure 2. J-V curve in the dark of an ITO/Polymer 8a/LiF/Al device in log axis for estimating the electron mobility of Polymer 8a. The thickness of Polymer 8a is around 140 nm. The open rectangle symbols are the experimental data. The solid line from 0.01 to 0.40 V means log J is fitted linearly dependent on log V with a slope of 1. For the solid line from 0.60 to 1.0 V log J is fitted linearly dependent on log V with a slope of 2 (SCLC area).

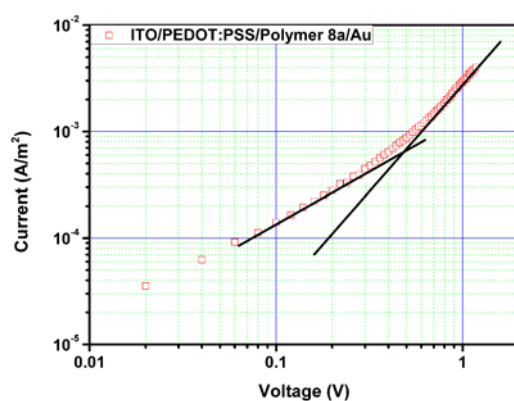

Figure 3. J-V curve in the dark of an ITO/PEDOT:PSS/Polymer 8a/Au device in log axis for estimating the hole mobility of Polymer 8a. The thickness of Polymer 8a is around 140 nm. The open rectangle symbols are the experimental data. The solid line from 0.01 to 0.40 V means log J is fitted linearly dependent on log V with a slope of 1. For the solid line from 0.60 to 1.0 V log J is fitted linearly dependent on log V with a slope of 2 (SCLC area).
